# Supplementary material for: Operando observation of CO2 transport intermediates in polyvinylamine facilitated transport membranes, and the role of water in the formation of intermediates, using transmission FTIR spectroscopy
Source: Royal Society of Chemistry journal article supplement (doi:10.1039/d1ta10015g), 2022-01-01
Supplement: d1ta10015g1.pdf [file d1ta10015g1.pdf]

**Supporting Information of:**

**Operando Observation of CO<sub>2</sub> Transport Intermediates in Polyvinylamine Facilitated  
Transport Membranes, and the Role of Water in the Formation of Intermediates, Using  
Transmission FTIR Spectroscopy**

Sarah G. Pate,<sup>a</sup> Hui Xu,<sup>b</sup> and Casey P. O'Brien<sup>a\*</sup>

<sup>a</sup>Department of Chemical and Biomolecular Engineering, University of Notre Dame, Notre  
Dame, IN 46556, USA

<sup>b</sup>Department of Chemistry and Biochemistry, University of Notre Dame, Notre Dame, IN 46556,  
USA

\*Corresponding Author Email Address: [cobrie23@nd.edu](mailto:cobrie23@nd.edu)

The assembled permeation cell is shown from the front view (see **Figure S1(a)**) and the side view (see **Figure S1(b)**). The assembled cell is installed into the permeation system such that it rests on a holder in the FTIR spectrometer for operando measurements (see **Figure S1(c)**).

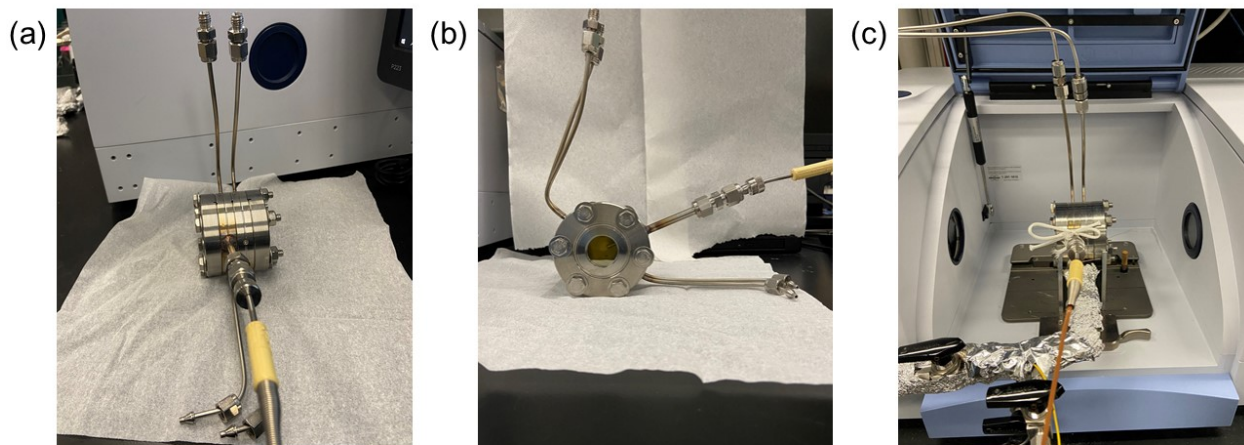

**Figure S1.** Assembled permeation cell from (a) front view and (b) side view and (c) assembled permeation cell installed to holder in spectrometer for operando measurements.

The FTIR spectrum of the thickest film ( $59 \pm 1 \mu\text{m}$ ) displays saturated infrared bands from  $1645\text{-}1690 \text{ cm}^{-1}$  and at  $1590 \text{ cm}^{-1}$  (see **Figure S2**). As expected, thinner free-standing films displays less saturation of these bands, with a  $25 \pm 4 \mu\text{m}$  thick film displaying saturation from  $1645\text{-}1690 \text{ cm}^{-1}$  and a  $4 \pm 1 \mu\text{m}$  thick film displaying no saturation in the FTIR spectrum.

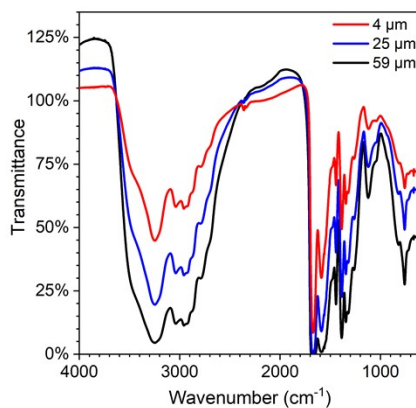

**Figure S2.** Transmission FTIR spectra collected of free standing PVAm films of varying thicknesses.

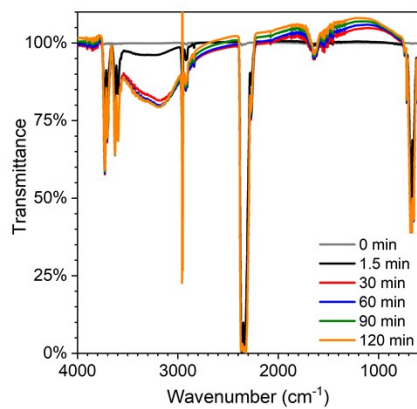

**Figure S3.** Transmission FTIR spectra for the porous PP support at 22 °C and humid 30 kPa CO<sub>2</sub>, 3.7 kPa H<sub>2</sub>O, and balance N<sub>2</sub>.
